# Supplementary material
Source: publisher site journal article supplement (https://www.dovepress.com/article/429516)
Supplement: Supplementary file 1 [file get_supplementary_file.php]

# Supplementary Material

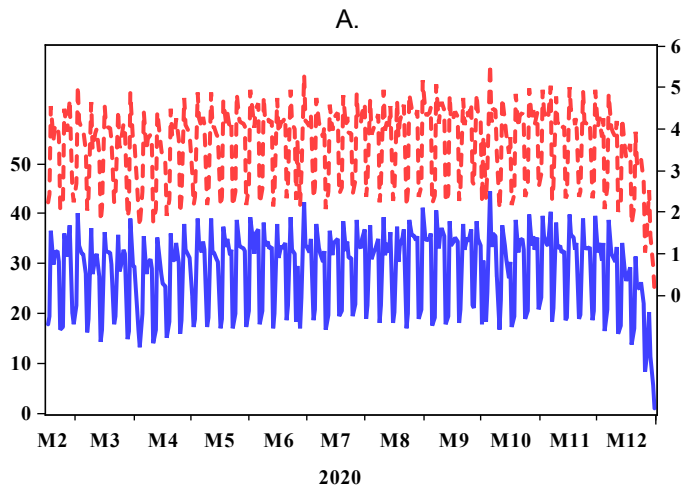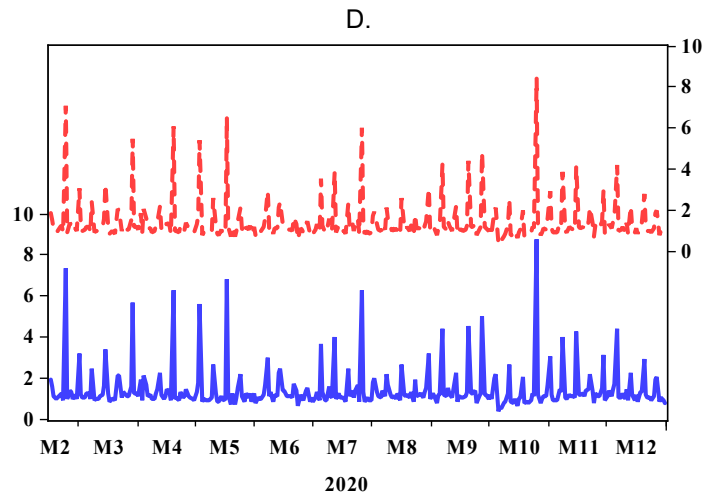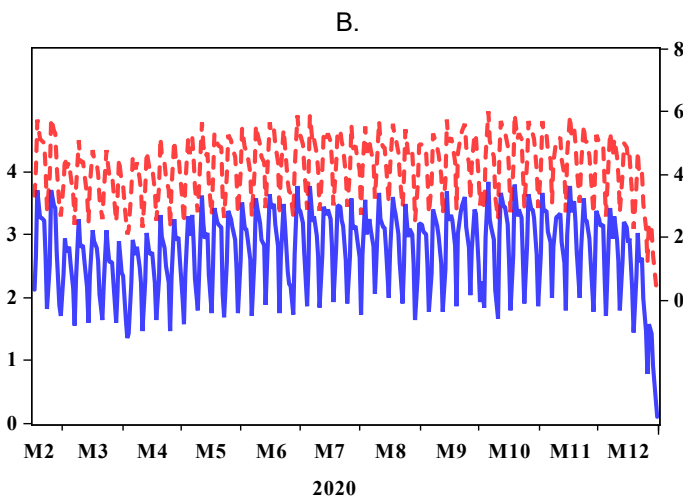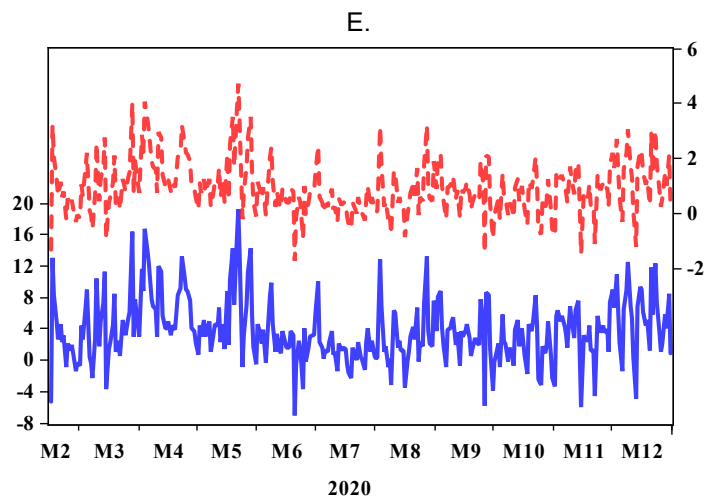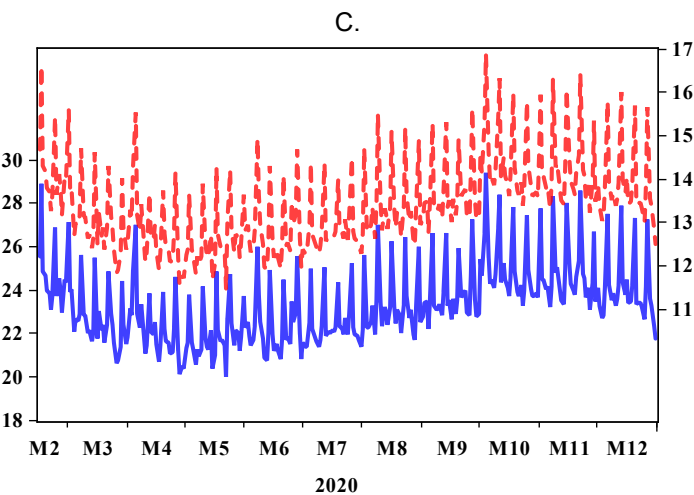

**Figure S1 Time plots for all variables used in this study**

Notes: Sub-figures A, B, C, D, and E illustrate the time plots for Inpatient Care Quality (ICQ), Outpatient Care Quality (OCQ), Emergency Care Quality (ECQ), Physician Mental Health (PMH) Indicators, and Social Distance Index (SDI), respectively. Blue solid and red-dot lines demonstrate un-standardized and standardized time series, respectively. The sample period ran from February 15, 2020 to December 31, 2020, resulting in a total of 321 daily observations.
